# Supplementary material for: Theaflavin 3, 3′-Digallate Delays Ovarian Aging by Improving Oocyte Quality and Regulating Granulosa Cell Function
Source: Oxid Med Cell Longev. 2021 Dec 8;2021:7064179. doi: 10.1155/2021/7064179 (PMC8674650; doi:10.1155/2021/7064179)
Supplement: Supplementary 1 — Supplementary Table S1: primers used in the study. [file 7064179.f1.txt]

Supplementary Table S1. Primers used in the study
Gene name	species	Forward	Reverse
AMH	mouse	CATCTTAACCCTTCAACCAAGC	CGGGAATCAGAGCCAAATAGAA
GDF9	mouse	CAGAGTGTATAGCAAGACCGAT	CTCCAGAGCACTCTACTACATG
BMP15	mouse	ACATTGCCCTCAATTTTGGATC	TAACTTGAGCATGTACCTCAGG
IL2	mouse	TGAGCAGGATGGAGAATTACAG	CAGAGGTCCAAGTTCATCTTCT
IL6	mouse	CTCCCAACAGACCTGTCTATAC	CCATTGCACAACTCTTTTCTCA
TNF��	mouse	CCCTCACACTCAGATCATCTTCT	GCTACGACGTGGGCTACAG
GAPDH	mouse	TTGTGGAAGGGCTCATGA	GATGCAGGGATGATGTTC
